# Supplementary material for: Centrobin is essential for C-tubule assembly and flagellum development in Drosophila melanogaster spermatogenesis
Source: PubMed Central journal article supplement — J Cell Biol. 2018 Jul 2;217(7):2365–72. doi: 10.1083/jcb.201801032 (PMC6028543; doi:10.1083/jcb.201801032), 2018-07-02
Supplement: JCB_201801032_sm.pdf [file JCB_201801032_sm.pdf]

## Supplemental material

Reina et al., <https://doi.org/10.1083/jcb.201801032>

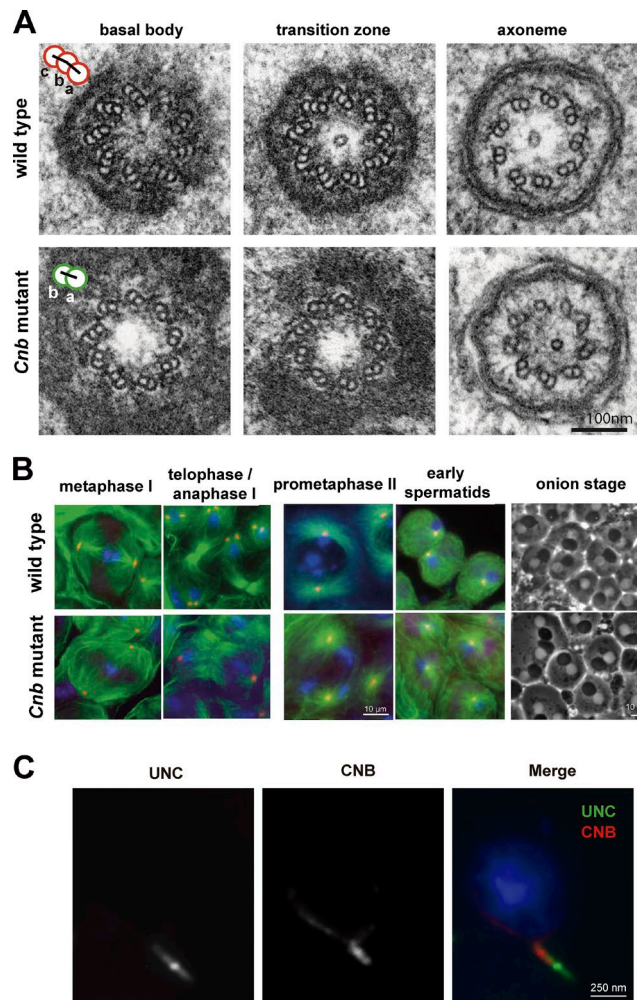

Figure S1. **Additional EM, immunofluorescence, and phase-contrast microscopy studies.** **(A)** EM sections through basal body, transition zone, and axoneme of WT and *Cnb* mutant early spermatids. WT basal bodies are made of triplets composed of A-, B-, and C-tubules arranged along a nearly straight line (cartoon, red). At the transition zone, the outermost tubule (C-tubule) progressively lost protofilaments, leaving behind C-tubule remnants extending along the axoneme. C-tubules in *Cnb* mutant basal bodies were either mispositioned or lacking, leaving doublets behind (cartoon, green). *Cnb* mutant transition zones and axonemes often lack C-tubule remnants. **(B)** Immunofluorescence and phase-contrast microscopy showing DNA (blue), microtubules (green), and centrioles (orange) at metaphase I, telophase/anaphase I, prometaphase II, early spermatids, and onion-stage spermatids in WT and *Cnb* mutant males. *Cnb* mutant males assemble apparently normal first and second meiotic spindles and generate normal cysts of postmeiotic onion-stage spermatids that present uniform nuclear sizes (white circles in onion-stage cells). **(C)** Immunofluorescence staining showing the localization of UNC (green), CNB (red), and DNA (blue) in WT spermatids.

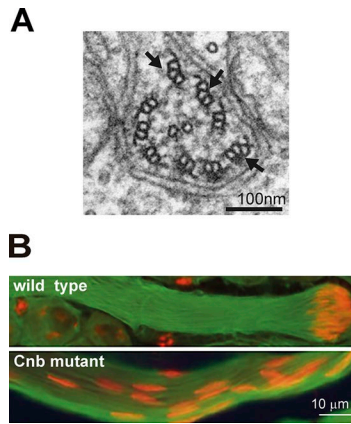

Figure S2. **Ultrastructural details of a *Cnb* mutant axoneme that presents triplets with open sheaths and immunofluorescence showing scattered nuclei over the tails in *Cnb* mutant spermatids.** (A) Section through a *Cnb* mutant axoneme that presents three triplets with open sheaths (arrows). (B) Immunofluorescence showing tails (green) and nuclei (orange) in bundles of elongating WT and *Cnb* mutant spermatids.

Table S1. **Number of C-tubules observed in 11 *Cnb* mutant basal bodies**

| Basal body number | C-tubules |
|-------------------|-----------|
| 1                 | 6         |
| 2                 | 5         |
| 3                 | 0         |
| 4                 | 0         |
| 5                 | 0         |
| 6                 | 0         |
| 7                 | 4         |
| 8                 | 0         |
| 9                 | 0         |
| 10                | 5         |
| 11                | 0         |

Table S2. **Length of mother and daughter basal body pairs in WT and *Cnb* mutant males**

| Cell number | Basal body length in spermatocytes |          |                   |          |
|-------------|------------------------------------|----------|-------------------|----------|
|             | WT                                 |          | <i>Cnb</i> mutant |          |
|             | Mother                             | Daughter | Mother            | Daughter |
|             | $\mu m$                            | $\mu m$  | $\mu m$           | $\mu m$  |
| 1           | 1.06                               | 1        | 0.81              | 0.62     |
| 2           | 0.96                               | 1.06     | 0.79              | 0.65     |
| 3           | 1.05                               | 0.95     | 0.71              | 0.53     |
| 4           | 1.02                               | 0.97     | 0.74              | 0.52     |
| 5           | 0.98                               | 1.04     | 0.78              | 0.69     |
| Mean        | 1.02                               | 1.00     | 0.78              | 0.62     |
| SD          | 0.04                               | 0.05     | 0.04              | 0.07     |
